# Supplementary material
Source: MDPI journal article supplement (https://www.mdpi.com/2227-7390/9/11/1200)
Supplement: s1 [file s1]

# Supplementary Materials

## 1. Inter-Subject Variability

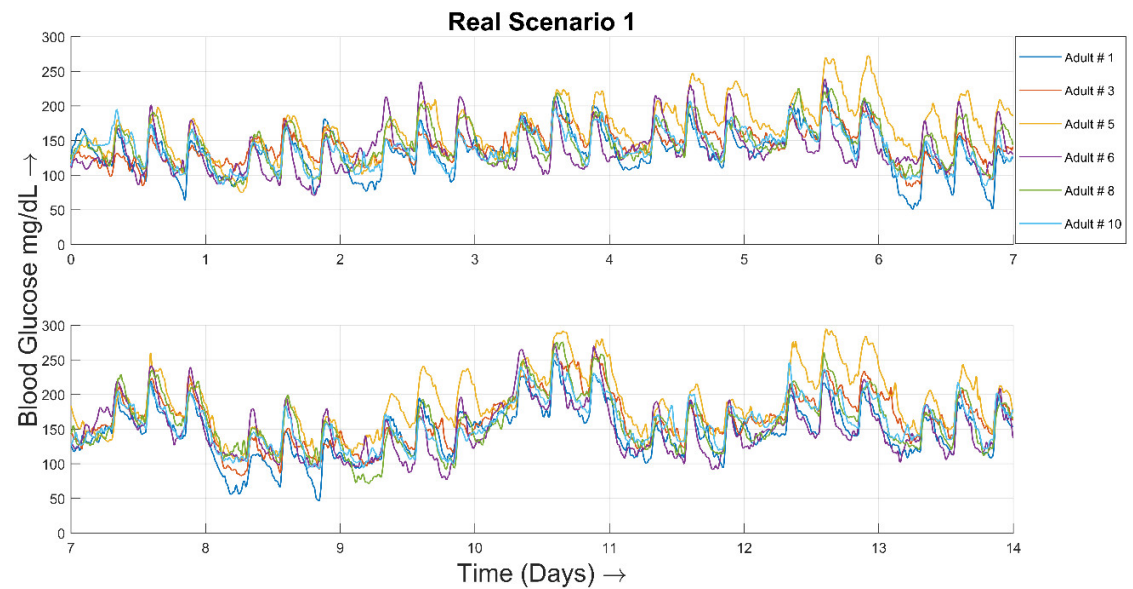

Figure S1. Simulation results for real scenario 1.

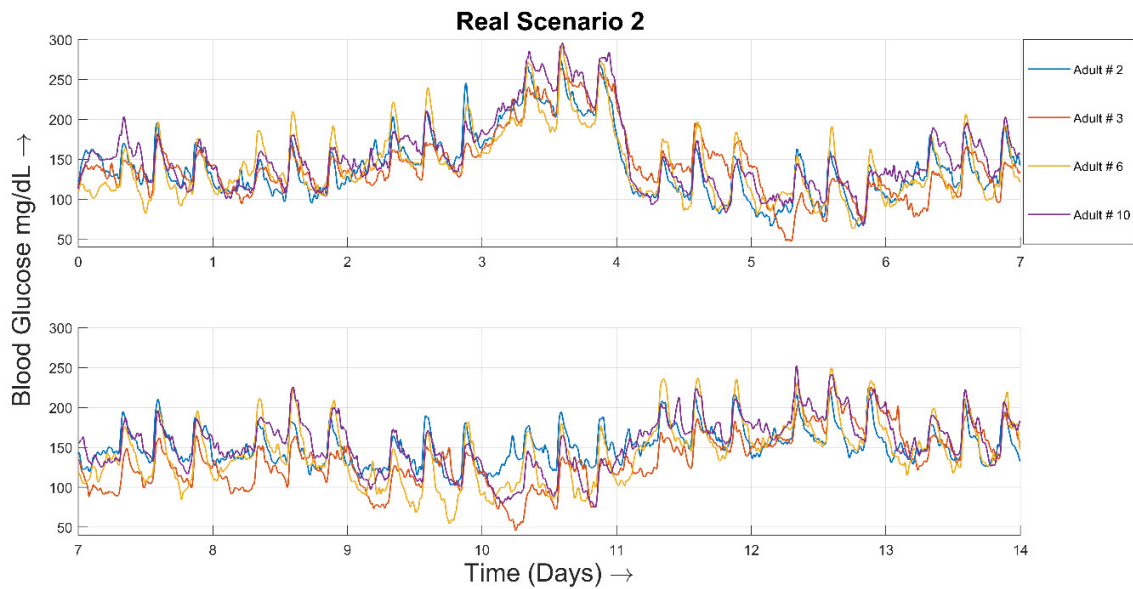

Figure S2. Simulation results for real scenario 2.

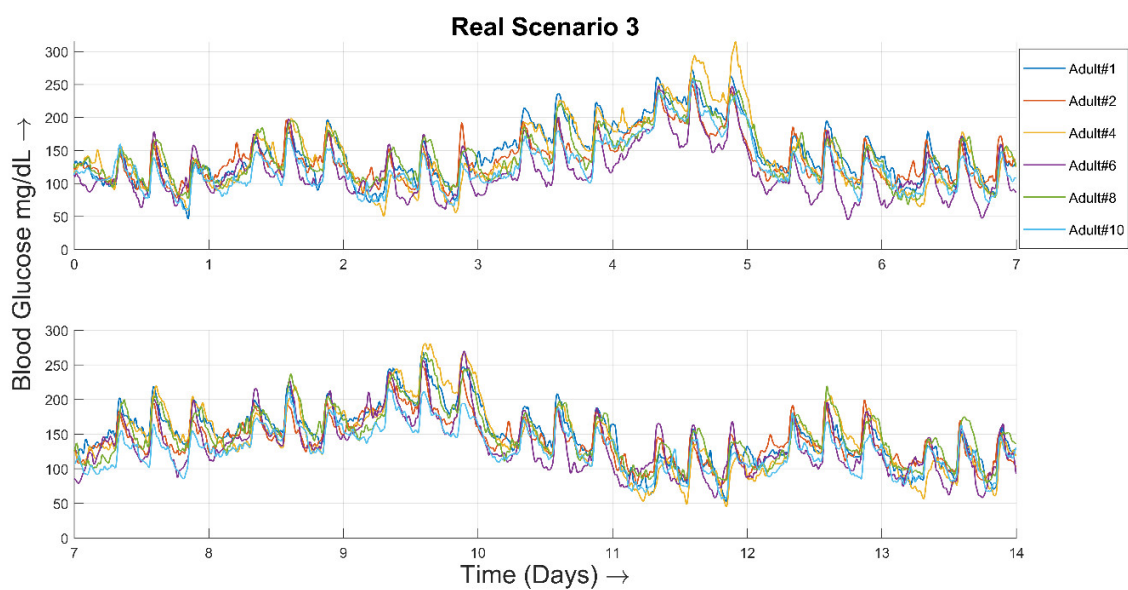

**Figure S3.** Simulation results for real scenario 3.

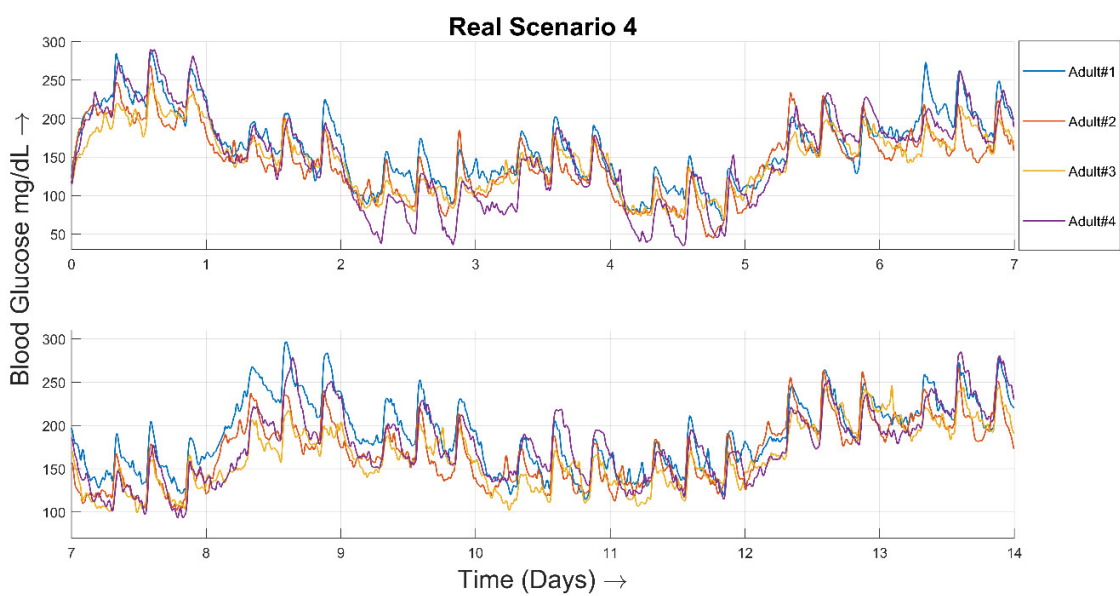

**Figure S4.** Simulation results for real scenario 4.

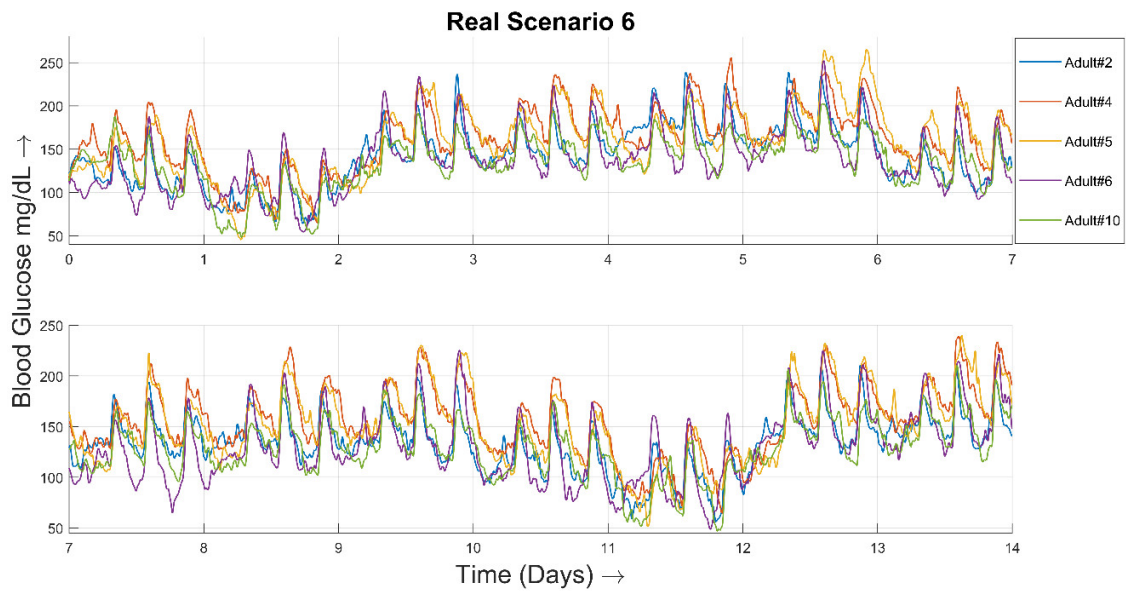

**Figure S5.** Simulation results for real scenario 6.

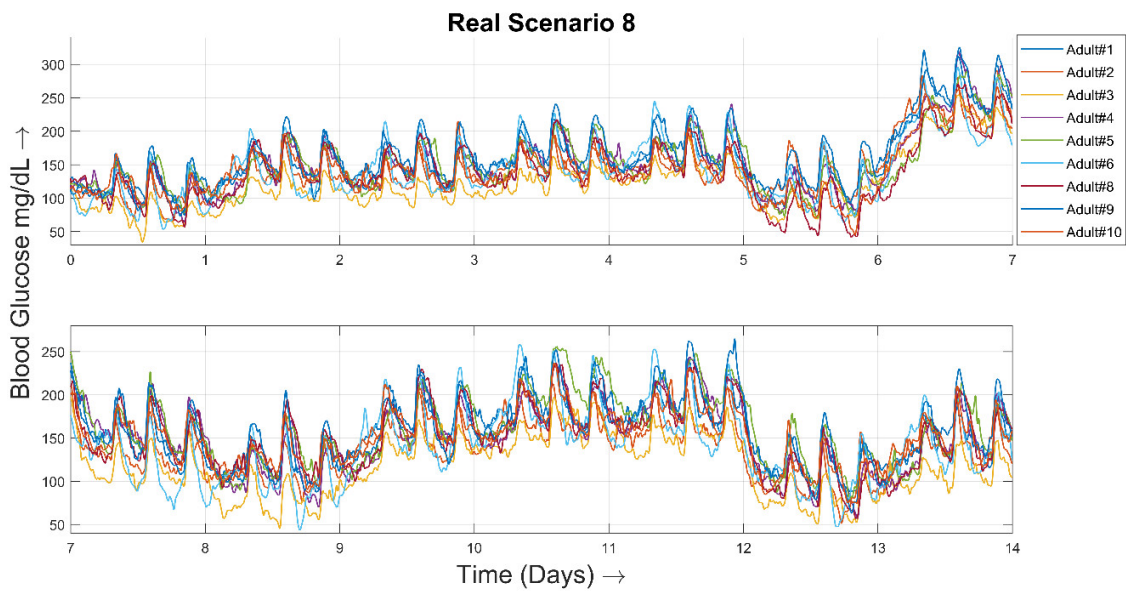

**Figure S6.** Simulation results for real scenario 8.

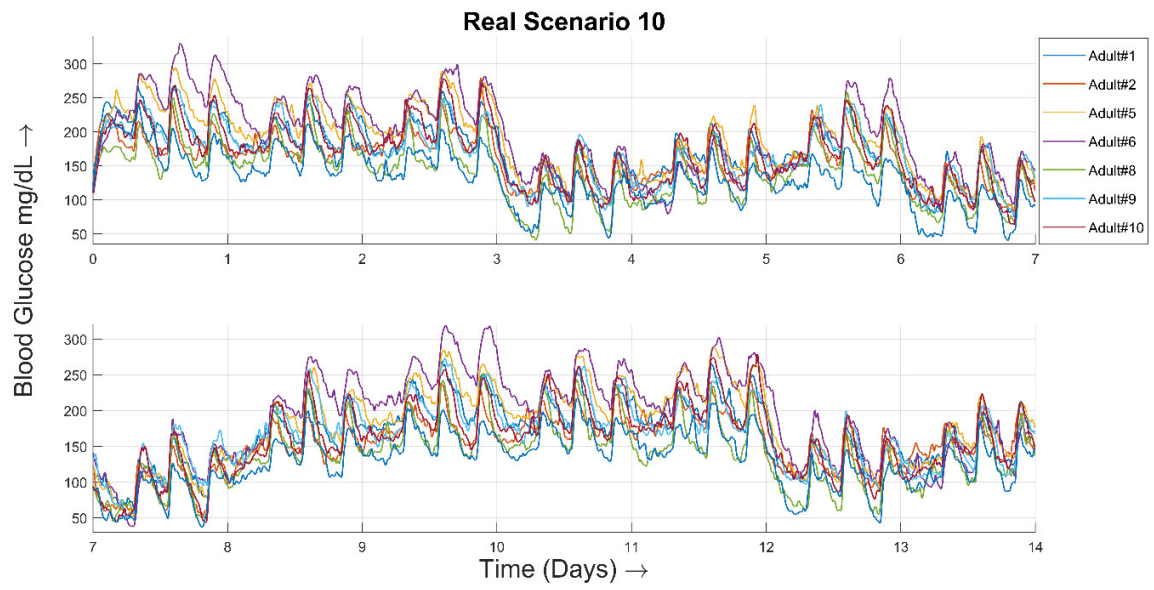

**Figure S7.** Simulation results for real scenario 10.

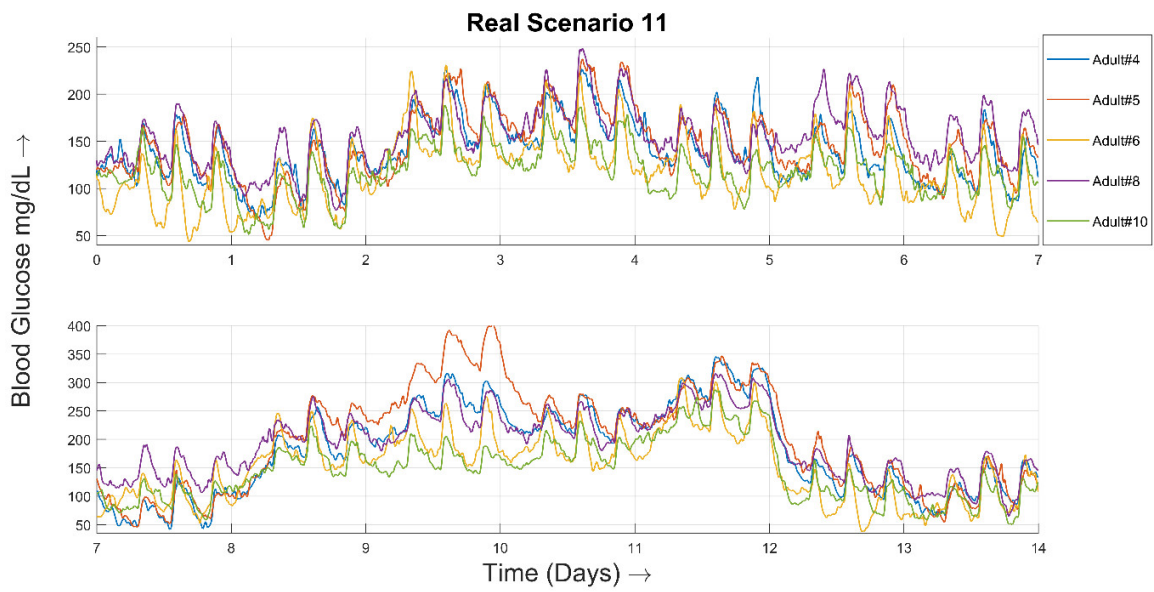

**Figure S8.** Simulation results for real scenario 11.

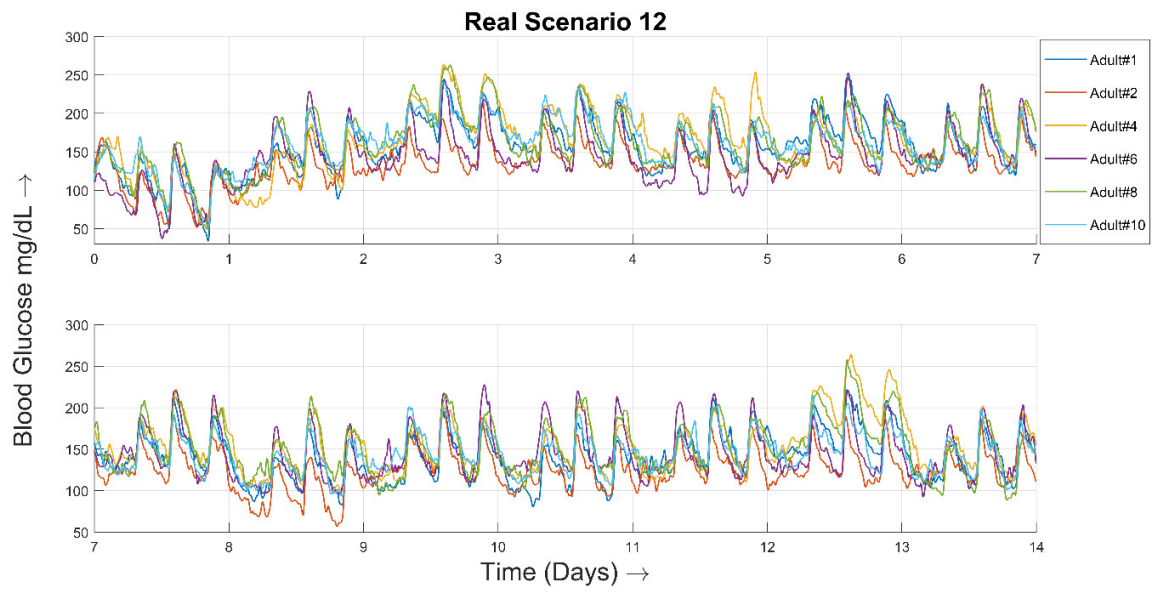

**Figure S9.** Simulation results for real scenario 12.

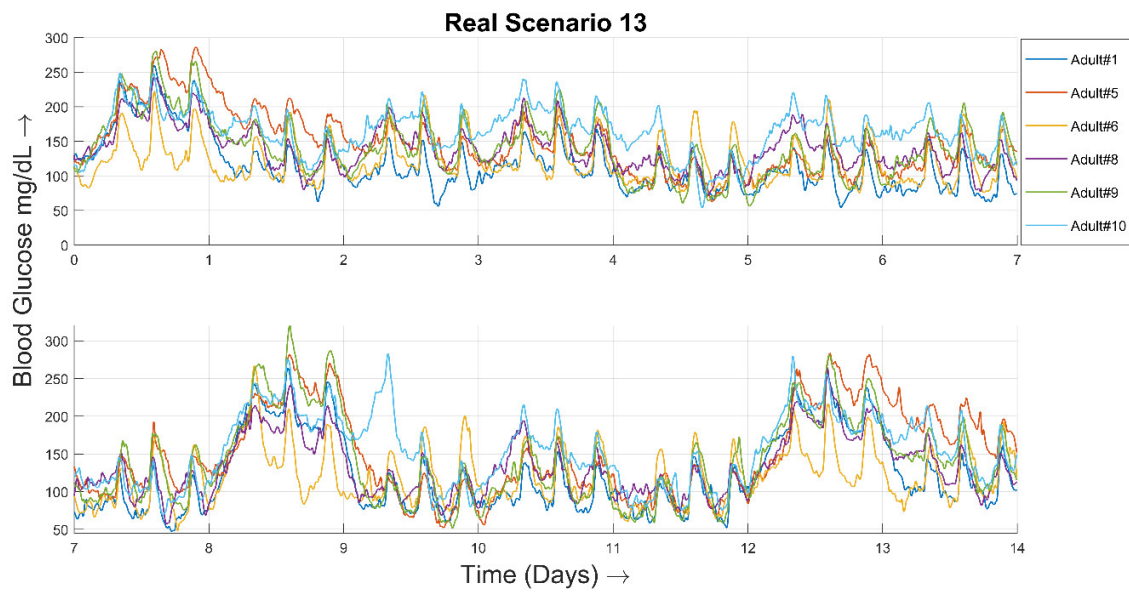

**Figure S10.** Simulation results for real scenario 13.



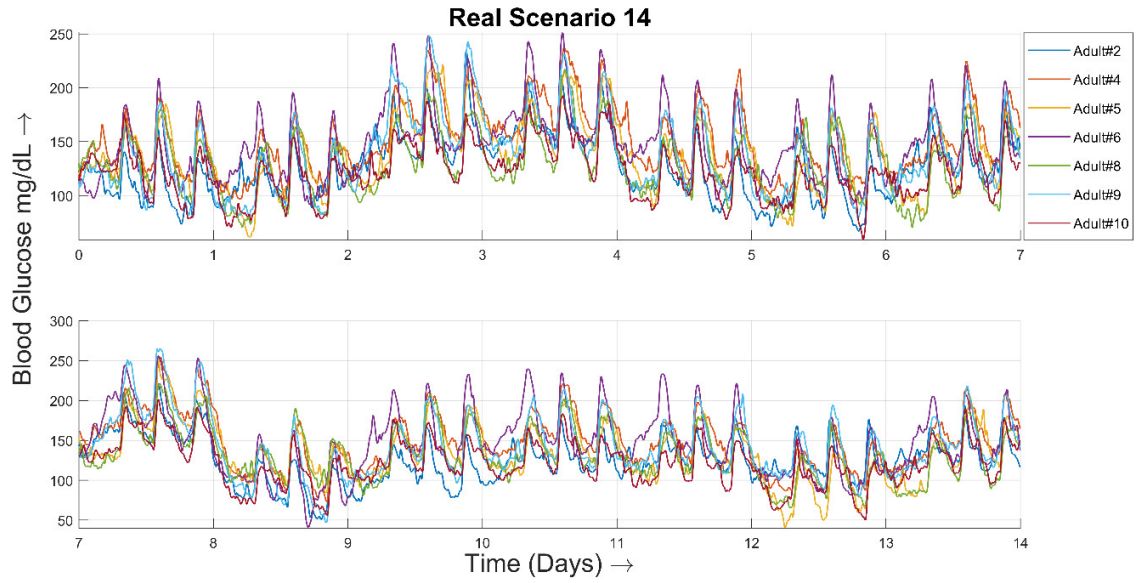

**Figure S11.** Simulation results for real scenario 14.

## 2. Values of Parameters

**Table S1.** Values of optimized parameters corresponding to real patient 1.

| Real Scenario 1 |           |          |           |          |           |          |           |          |           |          |            |          |
|-----------------|-----------|----------|-----------|----------|-----------|----------|-----------|----------|-----------|----------|------------|----------|
|                 | Adult # 1 |          | Adult # 3 |          | Adult # 5 |          | Adult # 6 |          | Adult # 8 |          | Adult # 10 |          |
| Day             | $V_{mx}$  | $k_{p1}$ | $V_{mx}$   | $k_{p1}$ |
| 1               | 0.0931    | 6.3442   | 0.0726    | 5.4147   | 0.0265    | 5.1833   | 0.0798    | 4.4457   | 0.0476    | 3.1161   | 0.0483     | 7.5225   |
| 2               | 0.0783    | 6.3552   | 0.0582    | 5.6828   | 0.0250    | 5.1279   | 0.0827    | 3.9843   | 0.0458    | 3.0199   | 0.0458     | 7.2632   |
| 3               | 0.0882    | 6.4973   | 0.0665    | 5.8374   | 0.0259    | 5.5640   | 0.0696    | 5.0822   | 0.0450    | 3.3592   | 0.0484     | 7.7404   |
| 4               | 0.0740    | 7.0648   | 0.0579    | 6.1797   | 0.0232    | 5.5620   | 0.0753    | 4.7046   | 0.0430    | 3.3081   | 0.0423     | 8.0736   |
| 5               | 0.0869    | 6.7187   | 0.0596    | 6.1299   | 0.0225    | 5.7974   | 0.0671    | 5.1131   | 0.0448    | 3.3727   | 0.0441     | 8.2244   |
| 6               | 0.0725    | 7.4209   | 0.0574    | 6.3584   | 0.0216    | 5.9140   | 0.0700    | 5.0518   | 0.0401    | 3.5452   | 0.0408     | 8.5327   |
| 7               | 0.0957    | 6.1776   | 0.0713    | 5.5119   | 0.0238    | 5.4750   | 0.0770    | 4.6031   | 0.0484    | 3.1221   | 0.0517     | 7.2517   |
| 8               | 0.0791    | 7.4406   | 0.0584    | 6.6989   | 0.0246    | 5.8528   | 0.0631    | 5.5944   | 0.0413    | 3.6544   | 0.0432     | 8.6492   |
| 9               | 0.0974    | 6.0674   | 0.0740    | 5.3128   | 0.0270    | 5.1870   | 0.0803    | 4.4200   | 0.0494    | 3.0609   | 0.0505     | 7.4264   |
| 10              | 0.0817    | 6.5974   | 0.0661    | 5.6512   | 0.0225    | 5.6286   | 0.0831    | 4.2671   | 0.0481    | 3.0524   | 0.0501     | 7.4846   |
| 11              | 0.0727    | 8.0847   | 0.0532    | 7.3372   | 0.0223    | 6.4555   | 0.0567    | 6.2189   | 0.0366    | 4.1072   | 0.0393     | 9.4923   |
| 12              | 0.0877    | 6.6598   | 0.0622    | 5.9383   | 0.0253    | 5.4779   | 0.0785    | 4.5174   | 0.0470    | 3.1850   | 0.0435     | 8.1040   |
| 13              | 0.0757    | 7.3972   | 0.0548    | 6.8547   | 0.0212    | 6.3153   | 0.0664    | 5.3237   | 0.0388    | 3.7319   | 0.0396     | 9.0517   |
| 14              | 0.0725    | 6.7247   | 0.0533    | 6.1399   | 0.0228    | 5.5025   | 0.0715    | 4.6685   | 0.0413    | 3.2725   | 0.0395     | 8.1393   |

**Table S2.** Values of optimized parameters corresponding to real patient 2.

| Real Scenario 2 |           |           |           |            |
|-----------------|-----------|-----------|-----------|------------|
|                 | Adult # 2 | Adult # 3 | Adult # 6 | Adult # 10 |

| Day | $V_{mx}$ | $k_{p1}$ | $V_{mx}$ | $k_{p1}$ | $V_{mx}$ | $k_{p1}$ | $V_{mx}$ | $k_{p1}$ |
|-----|----------|----------|----------|----------|----------|----------|----------|----------|
| 1   | 0.0897   | 9.2091   | 0.0608   | 5.7832   | 0.0869   | 4.0777   | 0.0473   | 7.6120   |
| 2   | 0.1011   | 8.8657   | 0.0692   | 5.6719   | 0.0792   | 4.4814   | 0.0494   | 7.5887   |
| 3   | 0.0866   | 10.3151  | 0.0636   | 6.1641   | 0.0715   | 4.9528   | 0.0443   | 8.4457   |
| 4   | 0.0722   | 12.3276  | 0.0514   | 7.5956   | 0.0575   | 6.1336   | 0.0362   | 10.2953  |
| 5   | 0.0975   | 8.5991   | 0.0470   | 5.7770   | 0.0679   | 3.8529   | 0.0464   | 7.0992   |
| 6   | 0.1005   | 8.2430   | 0.0704   | 5.0450   | 0.0959   | 3.6903   | 0.0484   | 7.0142   |
| 7   | 0.0880   | 9.2008   | 0.0619   | 5.5703   | 0.0770   | 4.2844   | 0.0429   | 8.1213   |
| 8   | 0.0804   | 9.8531   | 0.0701   | 5.6053   | 0.0804   | 4.4111   | 0.0465   | 8.0531   |
| 9   | 0.0919   | 9.7299   | 0.0690   | 5.6889   | 0.0737   | 4.8074   | 0.0445   | 8.3952   |
| 10  | 0.0893   | 9.0618   | 0.0616   | 5.2517   | 0.0908   | 3.5064   | 0.0440   | 7.2502   |
| 11  | 0.0752   | 9.2638   | 0.0706   | 5.1392   | 0.0824   | 3.8319   | 0.0501   | 6.9117   |
| 12  | 0.0847   | 10.5425  | 0.0638   | 6.1456   | 0.0680   | 5.2037   | 0.0635   | 9.3809   |

**Table S3.** Values of optimized parameters corresponding to real patient 3.

| Real Scenario 3 |           |          |           |          |           |          |           |          |           |          |            |          |
|-----------------|-----------|----------|-----------|----------|-----------|----------|-----------|----------|-----------|----------|------------|----------|
|                 | Adult # 1 |          | Adult # 2 |          | Adult # 4 |          | Adult # 6 |          | Adult # 8 |          | Adult # 10 |          |
| Day             | $V_{mx}$  | $k_{p1}$ | $V_{mx}$   | $k_{p1}$ |
| 1               | 0.1196    | 4.9634   | 0.1164    | 7.4933   | 0.0531    | 6.0577   | 0.1025    | 3.4484   | 0.0580    | 2.6171   | 0.0599     | 6.2816   |
| 2               | 0.1021    | 5.7401   | 0.1028    | 8.7180   | 0.0456    | 6.9651   | 0.0871    | 4.0695   | 0.0484    | 2.9785   | 0.0535     | 7.0107   |
| 3               | 0.1152    | 5.1475   | 0.1143    | 7.6279   | 0.0538    | 6.2136   | 0.1076    | 3.2821   | 0.0557    | 2.7234   | 0.0578     | 6.5028   |
| 4               | 0.0851    | 6.4028   | 0.0948    | 8.9830   | 0.0422    | 7.3552   | 0.0834    | 4.1638   | 0.0484    | 3.1221   | 0.0508     | 7.3805   |
| 5               | 0.0818    | 7.2006   | 0.0836    | 10.6442  | 0.0376    | 8.4105   | 0.0663    | 5.3343   | 0.0407    | 3.7051   | 0.0413     | 9.0420   |
| 6               | 0.1054    | 5.6166   | 0.1114    | 8.0621   | 0.0512    | 6.5296   | 0.1075    | 3.2854   | 0.0556    | 2.7261   | 0.0541     | 6.9354   |
| 7               | 0.1080    | 5.2725   | 0.1135    | 7.9119   | 0.0485    | 6.2416   | 0.1067    | 3.3085   | 0.0554    | 2.6557   | 0.0574     | 6.5419   |
| 8               | 0.0878    | 6.0886   | 0.1031    | 8.6919   | 0.0430    | 7.0916   | 0.0815    | 4.3542   | 0.0500    | 3.0280   | 0.0535     | 6.9490   |
| 9               | 0.0934    | 6.3252   | 0.0977    | 9.1596   | 0.0463    | 7.2020   | 0.0746    | 4.7462   | 0.0472    | 3.2037   | 0.0483     | 7.7559   |
| 10              | 0.0833    | 7.0041   | 0.0866    | 10.3151  | 0.0374    | 8.2020   | 0.0652    | 5.4193   | 0.0418    | 3.6079   | 0.0456     | 8.2060   |
| 11              | 0.0983    | 6.0131   | 0.1035    | 8.6572   | 0.0490    | 6.8138   | 0.0873    | 4.0614   | 0.0511    | 2.9585   | 0.0510     | 7.3525   |

**Table S4.** Values of optimized parameters corresponding to real patient 4.

| Real Scenario 4 |           |          |           |          |           |          |           |          |
|-----------------|-----------|----------|-----------|----------|-----------|----------|-----------|----------|
|                 | Adult # 1 |          | Adult # 2 |          | Adult # 3 |          | Adult # 4 |          |
| Day             | $V_{mx}$  | $k_{p1}$ | $V_{mx}$  | $k_{p1}$ | $V_{mx}$  | $k_{p1}$ | $V_{mx}$  | $k_{p1}$ |
| 1               | 0.0836    | 7.0523   | 0.0863    | 10.3461  | 0.0634    | 6.1826   | 0.0420    | 8.2152   |
| 2               | 0.0979    | 6.0372   | 0.1056    | 8.4959   | 0.0747    | 5.2662   | 0.0486    | 6.8604   |
| 3               | 0.1172    | 5.0617   | 0.1273    | 7.0749   | 0.0915    | 4.2943   | 0.0578    | 5.7981   |
| 4               | 0.1063    | 5.5718   | 0.1117    | 8.0380   | 0.0782    | 5.0324   | 0.0498    | 6.5116   |
| 5               | 0.1276    | 4.6576   | 0.1342    | 6.6333   | 0.0962    | 4.0832   | 0.0576    | 5.5305   |
| 6               | 0.0854    | 5.7858   | 0.0772    | 8.9287   | 0.0566    | 5.3153   | 0.0364    | 7.1184   |
| 7               | 0.0874    | 6.7514   | 0.0977    | 9.1596   | 0.0688    | 5.7060   | 0.0438    | 7.6124   |
| 8               | 0.0969    | 5.5312   | 0.1074    | 7.6454   | 0.0844    | 4.6650   | 0.0538    | 6.2148   |
| 9               | 0.0682    | 7.0676   | 0.0759    | 9.8265   | 0.0635    | 5.6544   | 0.0368    | 7.6347   |

|    |        |        |        |        |        |        |        |        |
|----|--------|--------|--------|--------|--------|--------|--------|--------|
| 10 | 0.0920 | 6.4195 | 0.0993 | 9.0159 | 0.0719 | 5.4626 | 0.0461 | 7.2381 |
| 11 | 0.0949 | 5.5317 | 0.0981 | 8.0358 | 0.0751 | 4.8273 | 0.0429 | 6.8919 |
| 12 | 0.1038 | 5.7003 | 0.1039 | 8.2977 | 0.0804 | 4.8944 | 0.0498 | 6.7070 |
| 13 | 0.0682 | 6.4679 | 0.0629 | 9.8924 | 0.0463 | 5.7999 | 0.0481 | 7.9425 |

**Table S5.** Values of optimized parameters corresponding to real patient 5.

| Real Scenario 5 |            |          |
|-----------------|------------|----------|
|                 | Adult # 10 |          |
| Day             | $V_{mx}$   | $k_{p1}$ |
| 1               | 0.0438     | 8.5375   |
| 2               | 0.0475     | 7.8795   |
| 3               | 0.0595     | 6.3194   |
| 4               | 0.0494     | 7.5887   |
| 5               | 0.0513     | 7.3086   |
| 6               | 0.0576     | 6.5288   |
| 7               | 0.0486     | 6.9875   |
| 8               | 0.0505     | 7.4190   |
| 9               | 0.0514     | 7.2940   |
| 10              | 0.0443     | 8.4373   |
| 11              | 0.0446     | 8.2232   |

**Table S6.** Values of optimized parameters corresponding to real patient 6.

| Real Scenario 6 |           |          |           |          |           |          |           |          |           |          |            |          |
|-----------------|-----------|----------|-----------|----------|-----------|----------|-----------|----------|-----------|----------|------------|----------|
|                 | Adult # 2 |          | Adult # 4 |          | Adult # 5 |          | Adult # 6 |          | Adult # 8 |          | Adult # 10 |          |
| Day             | $V_{mx}$  | $k_{p1}$ | $V_{mx}$   | $k_{p1}$ |
| 1               | 0.1095    | 8.1987   | 0.0496    | 6.7271   | 0.0324    | 4.4562   | 0.0959    | 3.6896   | 0.0511    | 2.9656   | 0.0517     | 7.2576   |
| 2               | 0.1172    | 7.6643   | 0.0546    | 6.0029   | 0.0349    | 4.1632   | 0.1064    | 3.3185   | 0.0574    | 2.6434   | 0.0589     | 6.3817   |
| 3               | 0.0943    | 9.4821   | 0.0457    | 7.2875   | 0.0290    | 4.9853   | 0.0752    | 4.7131   | 0.0461    | 3.2776   | 0.0469     | 7.9745   |
| 4               | 0.0950    | 9.4178   | 0.0449    | 7.4095   | 0.0292    | 4.9555   | 0.0766    | 4.6300   | 0.0448    | 3.3727   | 0.0467     | 8.0130   |
| 5               | 0.0849    | 10.5109  | 0.0443    | 7.3039   | 0.0295    | 4.8591   | 0.0758    | 4.6765   | 0.0467    | 3.2352   | 0.0465     | 8.0531   |
| 6               | 0.0876    | 10.2043  | 0.0437    | 7.6200   | 0.0275    | 5.2536   | 0.0713    | 4.9627   | 0.0439    | 3.4401   | 0.0445     | 8.3952   |
| 7               | 0.1062    | 8.4451   | 0.0483    | 6.9085   | 0.0315    | 4.7574   | 0.0870    | 4.0736   | 0.0483    | 3.1315   | 0.0503     | 7.4473   |
| 8               | 0.0991    | 9.0340   | 0.0485    | 6.8879   | 0.0316    | 4.5873   | 0.0932    | 3.7997   | 0.0501    | 3.0189   | 0.0500     | 7.4921   |
| 9               | 0.0986    | 9.0883   | 0.0467    | 7.1447   | 0.0304    | 4.7631   | 0.0835    | 4.2501   | 0.0472    | 3.2005   | 0.0498     | 7.5221   |
| 10              | 0.0989    | 9.0521   | 0.0461    | 7.2381   | 0.0292    | 4.9456   | 0.0783    | 4.5301   | 0.0467    | 3.2385   | 0.0483     | 7.7559   |

**Table S7.** Values of optimized parameters corresponding to real patient 7.

| Real Scenario 7 |            |          |
|-----------------|------------|----------|
|                 | Adult # 10 |          |
| Day             | $V_{mx}$   | $k_{p1}$ |
| 1               | 0.0834     | 8.7982   |
| 2               | 0.0997     | 8.9800   |



|    |        |         |
|----|--------|---------|
| 3  | 0.0836 | 8.0699  |
| 4  | 0.1084 | 7.1049  |
| 5  | 0.0853 | 9.3034  |
| 6  | 0.0818 | 10.9028 |
| 7  | 0.1008 | 7.6554  |
| 8  | 0.0523 | 7.5278  |
| 9  | 0.0843 | 8.6151  |
| 10 | 0.0618 | 10.1839 |
| 11 | 0.0543 | 8.7110  |
| 12 | 0.0704 | 10.4797 |

**Table S8A.** Values of optimized parameters corresponding to real patient 8.

| Real Scenario 8 |           |          |           |          |           |          |           |          |           |          |
|-----------------|-----------|----------|-----------|----------|-----------|----------|-----------|----------|-----------|----------|
|                 | Adult # 1 |          | Adult # 2 |          | Adult # 3 |          | Adult # 4 |          | Adult # 5 |          |
| Day             | $V_{mx}$  | $k_{p1}$ |
| 1               | 0.1341    | 4.4286   | 0.1500    | 5.9843   | 0.1079    | 3.6323   | 0.0617    | 5.4310   | 0.0360    | 4.0336   |
| 2               | 0.1156    | 5.1321   | 0.1180    | 7.6199   | 0.0913    | 4.3072   | 0.0524    | 6.3824   | 0.0318    | 4.5498   |
| 3               | 0.1168    | 5.0820   | 0.1238    | 7.2657   | 0.0932    | 4.2168   | 0.0539    | 6.2074   | 0.0327    | 4.4313   |
| 4               | 0.1102    | 5.3769   | 0.1140    | 7.8804   | 0.0857    | 4.5947   | 0.0507    | 6.5611   | 0.0315    | 4.7507   |
| 5               | 0.1076    | 5.5064   | 0.1134    | 7.9198   | 0.0792    | 4.9724   | 0.0499    | 6.6213   | 0.0305    | 4.7403   |
| 6               | 0.0851    | 4.0959   | 0.0700    | 6.5278   | 0.0530    | 3.5027   | 0.0536    | 5.3772   | 0.0335    | 3.8415   |
| 7               | 0.0841    | 7.0101   | 0.0868    | 10.2945  | 0.0642    | 6.1027   | 0.0414    | 8.0380   | 0.0265    | 5.4397   |
| 8               | 0.1153    | 5.1424   | 0.1255    | 7.1732   | 0.0915    | 4.2986   | 0.0523    | 6.3952   | 0.0326    | 4.4446   |
| 9               | 0.1302    | 4.5644   | 0.1376    | 6.5336   | 0.1080    | 3.6279   | 0.0593    | 5.6504   | 0.0349    | 4.1590   |
| 10              | 0.1060    | 5.5886   | 0.1150    | 7.8098   | 0.0830    | 4.7460   | 0.0511    | 6.5427   | 0.0309    | 4.6791   |
| 11              | 0.1001    | 5.9070   | 0.1081    | 8.2961   | 0.0756    | 5.2044   | 0.0475    | 6.8210   | 0.0281    | 5.1403   |
| 12              | 0.1025    | 5.7738   | 0.1089    | 8.2398   | 0.0783    | 5.0264   | 0.0471    | 7.0820   | 0.0290    | 4.9903   |

**Table S8B.** Values of optimized parameters corresponding to real patient 8.

| Real Scenario 8 |           |          |           |          |           |          |            |          |
|-----------------|-----------|----------|-----------|----------|-----------|----------|------------|----------|
|                 | Adult # 6 |          | Adult # 8 |          | Adult # 9 |          | Adult # 10 |          |
| Day             | $V_{mx}$  | $k_{p1}$ | $V_{mx}$  | $k_{p1}$ | $V_{mx}$  | $k_{p1}$ | $V_{mx}$   | $k_{p1}$ |
| 1               | 0.1354    | 2.2674   | 0.0608    | 2.4934   | 0.0598    | 5.0801   | 0.0642     | 5.8639   |
| 2               | 0.1015    | 3.4796   | 0.0495    | 3.0578   | 0.0504    | 6.0048   | 0.0534     | 7.0318   |
| 3               | 0.1025    | 3.4484   | 0.0505    | 2.9978   | 0.0515    | 5.8812   | 0.0554     | 6.7790   |
| 4               | 0.0903    | 3.9241   | 0.0492    | 3.0762   | 0.0482    | 6.2787   | 0.0532     | 7.0529   |
| 5               | 0.0857    | 4.1360   | 0.0487    | 3.1071   | 0.0473    | 6.2605   | 0.0524     | 7.1510   |
| 6               | 0.0993    | 2.3847   | 0.0609    | 2.3353   | 0.0489    | 5.2789   | 0.0697     | 5.3871   |
| 7               | 0.0688    | 5.1426   | 0.0402    | 3.7461   | 0.0395    | 7.6232   | 0.0428     | 8.7170   |
| 8               | 0.1219    | 2.8906   | 0.0512    | 2.9567   | 0.0528    | 5.7382   | 0.0531     | 7.0670   |
| 9               | 0.1332    | 2.4164   | 0.0554    | 2.7398   | 0.0571    | 5.3161   | 0.0603     | 6.2378   |
| 10              | 0.0910    | 3.8928   | 0.0471    | 3.2133   | 0.0491    | 6.1556   | 0.0506     | 7.4101   |
| 11              | 0.0793    | 4.4725   | 0.0446    | 3.3896   | 0.0461    | 6.5585   | 0.0480     | 7.7948   |

|    |        |        |        |        |        |        |        |        |
|----|--------|--------|--------|--------|--------|--------|--------|--------|
| 12 | 0.0839 | 4.2289 | 0.0441 | 3.4195 | 0.0453 | 6.6697 | 0.0481 | 7.7792 |
|----|--------|--------|--------|--------|--------|--------|--------|--------|

**Table S9.** Values of optimized parameters corresponding to real patient 9.

| Real Scenario 9 |           |          |           |          |           |          |           |          |           |          |            |          |
|-----------------|-----------|----------|-----------|----------|-----------|----------|-----------|----------|-----------|----------|------------|----------|
|                 | Adult # 2 |          | Adult # 4 |          | Adult # 5 |          | Adult # 6 |          | Adult # 8 |          | Adult # 10 |          |
| Day             | $V_{mx}$  | $k_{p1}$ | $V_{mx}$   | $k_{p1}$ |
| 1               | 0.0994    | 3.8639   | 0.0872    | 1.5164   | 0.0587    | 2.1886   | 0.1469    | 1.0176   | 0.1207    | 1.8769   | 0.1308     | 2.6136   |
| 2               | 0.1143    | 3.6374   | 0.0675    | 2.1387   | 0.0624    | 2.2355   | 0.1346    | 0.9212   | 0.1527    | 1.7246   | 0.1026     | 3.6333   |
| 3               | 0.1285    | 4.4287   | 0.0517    | 2.8028   | 0.0724    | 2.4904   | 0.0801    | 1.8826   | 0.0819    | 3.7080   | 0.0786     | 4.7673   |
| 4               | 0.1451    | 4.3109   | 0.0463    | 3.1350   | 0.0989    | 2.1908   | 0.0754    | 2.0002   | 0.0708    | 4.1243   | 0.0708     | 5.3005   |
| 5               | 0.1446    | 4.6158   | 0.0428    | 3.4023   | 0.0986    | 2.0998   | 0.0763    | 1.9763   | 0.0723    | 4.2111   | 0.0738     | 5.0855   |
| 6               | 0.0933    | 4.4796   | 0.0556    | 2.5773   | 0.0642    | 2.2999   | 0.1056    | 1.3902   | 0.0757    | 3.6511   | 0.0903     | 4.1387   |
| 7               | 0.1192    | 4.6344   | 0.0505    | 2.8744   | 0.0707    | 2.7414   | 0.0730    | 2.0681   | 0.0905    | 3.3517   | 0.0771     | 4.8598   |
| 8               | 0.1007    | 3.9121   | 0.0660    | 2.1863   | 0.0626    | 2.3346   | 0.1379    | 0.8287   | 0.0914    | 2.4457   | 0.1007     | 3.7045   |
| 9               | 0.1166    | 4.3531   | 0.0526    | 2.7550   | 0.0682    | 2.5438   | 0.0821    | 1.8357   | 0.1003    | 3.0176   | 0.0847     | 4.4149   |
| 10              | 0.0853    | 4.7173   | 0.0473    | 2.9101   | 0.0695    | 2.4904   | 0.0804    | 1.8750   | 0.0656    | 3.7189   | 0.0803     | 4.5680   |
| 11              | 0.0952    | 3.6998   | 0.0642    | 1.7856   | 0.0553    | 2.0619   | 0.1226    | 0.8731   | 0.0781    | 2.5053   | 0.1090     | 3.4169   |
| 12              | 0.1356    | 5.0648   | 0.0453    | 3.2054   | 0.0692    | 2.9069   | 0.0681    | 2.2194   | 0.0703    | 4.3315   | 0.0686     | 5.4751   |
| 13              | 0.1637    | 4.2695   | 0.0436    | 3.3343   | 0.0882    | 2.4855   | 0.0671    | 2.2557   | 0.0709    | 4.2970   | 0.0718     | 5.2320   |
| 14              | 0.0999    | 3.7302   | 0.0406    | 1.8084   | 0.0512    | 2.0665   | 0.1346    | 0.8169   | 0.0698    | 2.4987   | 0.1288     | 2.8849   |

**Table S10A.** Values of optimized parameters corresponding to real patient 10.

| Real Scenario 10 |           |          |           |          |           |          |           |          |
|------------------|-----------|----------|-----------|----------|-----------|----------|-----------|----------|
|                  | Adult # 1 |          | Adult # 2 |          | Adult # 4 |          | Adult # 5 |          |
| Day              | $V_{mx}$  | $k_{p1}$ | $V_{mx}$  | $k_{p1}$ | $V_{mx}$  | $k_{p1}$ | $V_{mx}$  | $k_{p1}$ |
| 1                | 0.0682    | 8.6053   | 0.0737    | 12.0738  | 0.0343    | 9.6543   | 0.0203    | 6.8220   |
| 2                | 0.0695    | 8.4450   | 0.0734    | 12.1208  | 0.0357    | 9.6331   | 0.0211    | 6.5374   |
| 3                | 0.0684    | 8.5146   | 0.0705    | 12.6119  | 0.0338    | 9.7846   | 0.0214    | 6.7163   |
| 4                | 0.0870    | 6.7785   | 0.0899    | 9.9444   | 0.0431    | 7.6873   | 0.0264    | 5.4768   |
| 5                | 0.0779    | 7.5516   | 0.0799    | 11.1543  | 0.0390    | 8.5180   | 0.0259    | 5.5696   |
| 6                | 0.0720    | 8.1659   | 0.0755    | 11.7897  | 0.0360    | 9.2147   | 0.0223    | 6.4620   |
| 7                | 0.0891    | 6.6256   | 0.0928    | 9.6350   | 0.0434    | 7.6735   | 0.0266    | 5.4179   |
| 8                | 0.0903    | 6.5348   | 0.0965    | 9.2793   | 0.0444    | 7.5005   | 0.0270    | 5.3480   |
| 9                | 0.0742    | 7.9262   | 0.0799    | 11.1654  | 0.0363    | 9.1339   | 0.0221    | 6.5126   |

**Table S10B.** Values of optimized parameters corresponding to real patient 10.

| Real Scenario 10 |           |          |           |          |           |          |            |          |
|------------------|-----------|----------|-----------|----------|-----------|----------|------------|----------|
|                  | Adult # 6 |          | Adult # 8 |          | Adult # 9 |          | Adult # 10 |          |
| Day              | $V_{mx}$  | $k_{p1}$ | $V_{mx}$  | $k_{p1}$ | $V_{mx}$  | $k_{p1}$ | $V_{mx}$   | $k_{p1}$ |
| 1                | 0.0533    | 6.5995   | 0.0335    | 4.4770   | 0.0342    | 9.1177   | 0.0365     | 10.1929  |
| 2                | 0.0524    | 6.7180   | 0.0337    | 4.4546   | 0.0330    | 9.0831   | 0.0359     | 10.3656  |
| 3                | 0.0547    | 6.4378   | 0.0346    | 4.3412   | 0.0324    | 9.2648   | 0.0362     | 10.2850  |

|   |        |        |        |        |        |        |        |        |
|---|--------|--------|--------|--------|--------|--------|--------|--------|
| 4 | 0.0721 | 4.9084 | 0.0424 | 3.5548 | 0.0405 | 7.4364 | 0.0437 | 8.5461 |
| 5 | 0.0641 | 5.5111 | 0.0395 | 3.8096 | 0.0371 | 8.0979 | 0.0405 | 9.2136 |
| 6 | 0.0542 | 6.4895 | 0.0351 | 4.2774 | 0.0341 | 8.8181 | 0.0386 | 9.6628 |
| 7 | 0.0708 | 5.0016 | 0.0430 | 3.5054 | 0.0413 | 7.2906 | 0.0455 | 8.2215 |
| 8 | 0.0715 | 4.9528 | 0.0426 | 3.5442 | 0.0419 | 7.1979 | 0.0455 | 8.2142 |
| 9 | 0.0567 | 6.2189 | 0.0356 | 4.2187 | 0.0351 | 8.5506 | 0.0387 | 9.6435 |

**Table S11.** Values of optimized parameters corresponding to real patient 11.

| Real Scenario 11 |           |          |           |          |           |          |           |          |            |          |
|------------------|-----------|----------|-----------|----------|-----------|----------|-----------|----------|------------|----------|
|                  | Adult # 4 |          | Adult # 5 |          | Adult # 6 |          | Adult # 8 |          | Adult # 10 |          |
| Day              | $V_{mx}$  | $k_{p1}$ | $V_{mx}$  | $k_{p1}$ | $V_{mx}$  | $k_{p1}$ | $V_{mx}$  | $k_{p1}$ | $V_{mx}$   | $k_{p1}$ |
| 1                | 0.0594    | 5.6391   | 0.0363    | 3.9975   | 0.1461    | 2.2579   | 0.0593    | 2.5566   | 0.0620     | 6.0740   |
| 2                | 0.0432    | 5.0724   | 0.0298    | 3.4624   | 0.0334    | 2.0645   | 0.0343    | 1.8521   | 0.0431     | 5.3905   |
| 3                | 0.0488    | 6.5768   | 0.0304    | 4.5342   | 0.0882    | 4.0162   | 0.0514    | 2.9449   | 0.0521     | 7.2012   |
| 4                | 0.0504    | 6.6204   | 0.0308    | 4.7025   | 0.0893    | 3.9682   | 0.0483    | 3.1346   | 0.0524     | 7.1510   |
| 5                | 0.0547    | 6.1162   | 0.0343    | 4.2295   | 0.1093    | 3.2294   | 0.0572    | 2.6540   | 0.0591     | 6.3562   |
| 6                | 0.0556    | 6.0203   | 0.0335    | 4.3227   | 0.1078    | 3.2756   | 0.0509    | 2.9745   | 0.0557     | 6.7385   |
| 7                | 0.0597    | 5.6121   | 0.0365    | 3.9776   | 0.1231    | 2.4188   | 0.0570    | 2.6620   | 0.0602     | 6.2503   |
| 8                | 0.0660    | 5.0881   | 0.0400    | 3.6388   | 0.0946    | 2.5596   | 0.0602    | 2.5180   | 0.0640     | 5.8815   |
| 9                | 0.0475    | 7.0256   | 0.0285    | 5.0800   | 0.0777    | 4.5619   | 0.0455    | 3.3198   | 0.0491     | 7.6343   |
| 10               | 0.0388    | 7.8375   | 0.0208    | 5.7950   | 0.0705    | 4.8754   | 0.0368    | 3.5294   | 0.0478     | 7.5981   |
| 11               | 0.0449    | 7.4081   | 0.0290    | 4.9853   | 0.0760    | 4.6625   | 0.0444    | 3.4032   | 0.0467     | 8.0130   |
| 12               | 0.0394    | 8.4383   | 0.0263    | 5.6912   | 0.0627    | 5.6270   | 0.0391    | 3.8463   | 0.0402     | 9.2783   |

**Table S12.** Values of optimized parameters corresponding to real patient 12.

| Real Scenario 12 |           |          |           |          |           |          |           |          |           |          |            |          |
|------------------|-----------|----------|-----------|----------|-----------|----------|-----------|----------|-----------|----------|------------|----------|
|                  | Adult # 1 |          | Adult # 2 |          | Adult # 4 |          | Adult # 6 |          | Adult # 8 |          | Adult # 10 |          |
| Day              | $V_{mx}$  | $k_{p1}$ | $V_{mx}$   | $k_{p1}$ |
| 1                | 0.0872    | 6.3778   | 0.0864    | 9.9364   | 0.0388    | 7.6092   | 0.0814    | 4.3586   | 0.0463    | 3.2612   | 0.0482     | 7.7714   |
| 2                | 0.0786    | 7.4915   | 0.0798    | 11.1766  | 0.0378    | 8.7792   | 0.0609    | 5.7972   | 0.0392    | 3.8440   | 0.0392     | 9.5018   |
| 3                | 0.0602    | 8.3025   | 0.0694    | 11.7278  | 0.0277    | 9.8000   | 0.0534    | 5.7388   | 0.0288    | 4.1821   | 0.0310     | 10.2213  |
| 4                | 0.0710    | 8.2712   | 0.0734    | 12.1221  | 0.0338    | 9.8081   | 0.0592    | 5.9595   | 0.0378    | 3.9794   | 0.0363     | 10.2645  |
| 5                | 0.0774    | 7.6046   | 0.0680    | 11.7289  | 0.0334    | 9.5333   | 0.0663    | 5.1292   | 0.0380    | 3.8442   | 0.0372     | 9.4289   |
| 6                | 0.0685    | 8.5710   | 0.0734    | 11.8856  | 0.0349    | 9.5029   | 0.0588    | 5.9953   | 0.0378    | 3.9794   | 0.0379     | 9.8265   |
| 7                | 0.0746    | 7.8803   | 0.0725    | 11.8039  | 0.0349    | 9.5029   | 0.0591    | 5.9654   | 0.0374    | 4.0226   | 0.0393     | 9.4828   |
| 8                | 0.0750    | 7.7641   | 0.0776    | 11.4802  | 0.0354    | 9.3633   | 0.0604    | 5.8379   | 0.0396    | 3.8020   | 0.0407     | 9.1786   |
| 9                | 0.0821    | 7.0316   | 0.0856    | 10.4292  | 0.0362    | 8.6355   | 0.0691    | 5.1170   | 0.0418    | 3.6043   | 0.0435     | 8.5803   |
| 10               | 0.0805    | 7.3152   | 0.0722    | 11.5060  | 0.0381    | 9.1230   | 0.0622    | 5.6722   | 0.0404    | 3.7274   | 0.0395     | 9.4355   |
| 11               | 0.0819    | 7.1228   | 0.0791    | 10.8418  | 0.0358    | 8.9225   | 0.0607    | 5.8088   | 0.0396    | 3.8020   | 0.0416     | 8.9717   |
| 12               | 0.0758    | 7.7630   | 0.0783    | 11.3888  | 0.0370    | 8.9638   | 0.0622    | 5.6778   | 0.0401    | 3.7611   | 0.0400     | 9.3155   |
| 13               | 0.0673    | 8.0652   | 0.0758    | 11.4143  | 0.0298    | 9.9408   | 0.0607    | 5.5843   | 0.0337    | 4.0815   | 0.0386     | 9.4648   |
| 14               | 0.0793    | 7.4258   | 0.0774    | 11.1793  | 0.0365    | 8.9111   | 0.0665    | 5.3131   | 0.0429    | 3.5195   | 0.0420     | 8.9002   |

**Table S13.** Values of optimized parameters corresponding to real patient 13.

| Real Scenario 13 |           |          |           |          |           |          |           |          |           |          |            |          |
|------------------|-----------|----------|-----------|----------|-----------|----------|-----------|----------|-----------|----------|------------|----------|
|                  | Adult # 1 |          | Adult # 5 |          | Adult # 6 |          | Adult # 8 |          | Adult # 9 |          | Adult # 10 |          |
| Day              | $V_{mx}$  | $k_{p1}$ | $V_{mx}$   | $k_{p1}$ |
| 1                | 0.0970    | 4.4996   | 0.0311    | 3.7599   | 0.0820    | 2.7114   | 0.0499    | 2.2375   | 0.0575    | 5.0212   | 0.0667     | 5.4557   |
| 2                | 0.1330    | 2.7256   | 0.0381    | 2.9340   | 0.0572    | 2.1320   | 0.0976    | 1.2834   | 0.0765    | 3.6889   | 0.0978     | 3.8135   |
| 3                | 0.2008    | 2.3912   | 0.0532    | 2.7243   | 0.0628    | 2.6381   | 0.0872    | 1.7260   | 0.0783    | 3.8841   | 0.0815     | 4.5923   |
| 4                | 0.1384    | 3.0419   | 0.0496    | 2.9242   | 0.0827    | 2.4236   | 0.0833    | 1.8080   | 0.0715    | 4.2585   | 0.0758     | 4.9490   |
| 5                | 0.1116    | 2.0030   | 0.0533    | 1.7821   | 0.0550    | 2.1341   | 0.0880    | 0.7967   | 0.0690    | 2.1862   | 0.1231     | 2.4599   |
| 6                | 0.1876    | 2.1464   | 0.0601    | 2.4061   | 0.0583    | 2.2629   | 0.0937    | 1.6032   | 0.0899    | 3.3719   | 0.0817     | 4.5831   |
| 7                | 0.1198    | 2.0669   | 0.0458    | 2.6746   | 0.0547    | 1.9586   | 0.1037    | 1.1810   | 0.0631    | 3.7860   | 0.0939     | 3.9795   |
| 8                | 0.1306    | 1.6846   | 0.0368    | 2.2336   | 0.0489    | 1.4912   | 0.1129    | 0.6864   | 0.0505    | 2.8772   | 0.1155     | 2.4397   |
| 9                | 0.1140    | 4.5514   | 0.0349    | 3.7583   | 0.1250    | 2.1172   | 0.0636    | 2.1201   | 0.0474    | 5.3961   | 0.0677     | 5.5534   |
| 10               | 0.1137    | 1.9402   | 0.0539    | 1.3913   | 0.0551    | 2.1362   | 0.0852    | 0.5833   | 0.0690    | 2.1879   | 0.1279     | 2.2671   |
| 11               | 0.1230    | 2.4462   | 0.0510    | 2.6402   | 0.0612    | 2.2811   | 0.1103    | 1.3593   | 0.0823    | 3.5016   | 0.0890     | 4.1978   |
| 12               | 0.0556    | 2.1020   | 0.0347    | 1.6629   | 0.0510    | 1.6187   | 0.0657    | 0.4500   | 0.0328    | 1.8803   | 0.0310     | 3.0306   |

**Table S14.** Values of optimized parameters corresponding to real patient 14.

| Real Scenario 14 |           |          |           |          |           |          |           |          |           |          |           |          |            |          |
|------------------|-----------|----------|-----------|----------|-----------|----------|-----------|----------|-----------|----------|-----------|----------|------------|----------|
|                  | Adult # 2 |          | Adult # 4 |          | Adult # 5 |          | Adult # 6 |          | Adult # 8 |          | Adult # 9 |          | Adult # 10 |          |
| Day              | $V_{mx}$  | $k_{p1}$ | $V_{mx}$   | $k_{p1}$ |
| 1                | 0.1207    | 7.4481   | 0.0537    | 6.2261   | 0.0325    | 4.4624   | 0.0976    | 3.6230   | 0.0519    | 2.9162   | 0.0521    | 5.8180   | 0.0543     | 6.9146   |
| 2                | 0.1148    | 7.8254   | 0.0535    | 6.1836   | 0.0331    | 4.3828   | 0.1033    | 3.4209   | 0.0531    | 2.8533   | 0.0523    | 5.7948   | 0.0546     | 6.8733   |
| 3                | 0.0990    | 9.0430   | 0.0465    | 7.1661   | 0.0290    | 4.9903   | 0.0816    | 4.3493   | 0.0481    | 3.1440   | 0.0428    | 7.0497   | 0.0475     | 7.8716   |
| 4                | 0.0946    | 9.4555   | 0.0464    | 7.1876   | 0.0293    | 4.9269   | 0.0776    | 4.5710   | 0.0468    | 3.2288   | 0.0447    | 6.7556   | 0.0469     | 7.9745   |
| 5                | 0.1136    | 7.8265   | 0.0517    | 6.4582   | 0.0323    | 4.4929   | 0.0955    | 3.7044   | 0.0515    | 2.9391   | 0.0497    | 6.0834   | 0.0531     | 7.0670   |
| 6                | 0.1215    | 7.4036   | 0.0535    | 6.2448   | 0.0331    | 4.3705   | 0.1003    | 3.5223   | 0.0519    | 2.9162   | 0.0515    | 5.8812   | 0.0542     | 6.9215   |
| 7                | 0.1061    | 8.4536   | 0.0495    | 6.7393   | 0.0317    | 4.5690   | 0.0907    | 3.9045   | 0.0519    | 2.9162   | 0.0479    | 6.3102   | 0.0512     | 7.3159   |
| 8                | 0.0935    | 9.5678   | 0.0464    | 7.4497   | 0.0285    | 5.0648   | 0.0737    | 4.8074   | 0.0447    | 3.3781   | 0.0411    | 7.3418   | 0.0457     | 8.1896   |
| 9                | 0.1171    | 7.0028   | 0.0564    | 5.9318   | 0.0336    | 4.3141   | 0.1279    | 2.5135   | 0.0530    | 2.8590   | 0.0545    | 5.5642   | 0.0569     | 6.6064   |
| 10               | 0.1172    | 7.6643   | 0.0496    | 6.6883   | 0.0310    | 4.6744   | 0.0867    | 4.0899   | 0.0484    | 3.1252   | 0.0474    | 6.3723   | 0.0501     | 7.4846   |
| 11               | 0.1098    | 8.1742   | 0.0483    | 6.9085   | 0.0308    | 4.7072   | 0.0813    | 4.3673   | 0.0476    | 3.1782   | 0.0462    | 6.5454   | 0.0500     | 7.4996   |
| 12               | 0.1074    | 8.3543   | 0.0512    | 6.5296   | 0.0321    | 4.5199   | 0.0858    | 4.1319   | 0.0502    | 3.0159   | 0.0479    | 6.3102   | 0.0524     | 7.1510   |
| 13               | 0.1001    | 7.7886   | 0.0563    | 5.9497   | 0.0347    | 4.1840   | 0.0900    | 2.8394   | 0.0547    | 2.7695   | 0.0492    | 5.8480   | 0.0566     | 6.6328   |
| 14               | 0.1058    | 8.4789   | 0.0494    | 6.7596   | 0.0310    | 4.6650   | 0.0909    | 3.8967   | 0.0505    | 2.9978   | 0.0471    | 6.4107   | 0.0501     | 7.4771   |
